# Supplementary material for: Metastability of the atomic structures of size-selected gold nanoparticles
Source: Royal Society of Chemistry journal article supplement (doi:10.1039/c4nr05811a), 2015-01-01
Supplement: c4nr05811a1.pdf [file c4nr05811a1.pdf]

## Metastability of the atomic structures of size-selected gold nanoparticles

Dawn M. Wells<sup>†</sup>, Giulia Rossi<sup>‡</sup>, Riccardo Ferrando<sup>‡</sup> and Richard E. Palmer<sup>†\*</sup>

Au<sub>561</sub> Cuboctahedron (0,0)

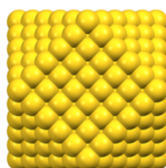

Au<sub>561</sub> Ino-decahedron (0,0)

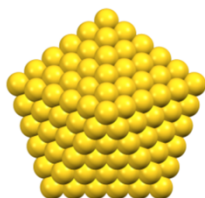

Au<sub>561</sub> Icosahedron (0,0)

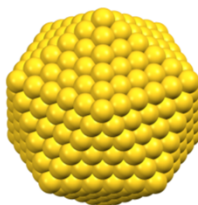

Cluster rotated  
through  $(\theta, \alpha)$

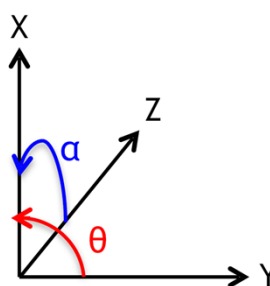

### Supplementary figure S1. Orientation of cluster structures used for electron scattering simulations

Geometrical models of the Au<sub>561</sub> cuboctahedron, Ino-decahedron and icosahedron are shown alongside a key to the angle of orientation of the cluster  $(\theta, \alpha)$  used in the electron scattering simulations.

## **SI Video legend**

### **Supplementary video S2. Au<sub>561</sub> structural transformation video**

A series of STEM images (video) of an Au<sub>561</sub> cluster, taken during continuous irradiation with the STEM electron beam. The cluster transforms from decahedral to fcc. A total of 51 frames were taken at a dose of  $2.1 \times 10^4$  e-/Angstrom<sup>2</sup>/frame, field of view 15.74nm×15.74nm and acquisition time per frame of 2.9s (images were cropped for the video to 5.5nm×5.5nm, frame time increased, and one frame was removed due to movement whilst imaging).
